# Supplementary material for: Social Disparities in Outpatient and Inpatient Management of Pediatric Supracondylar Humerus Fractures
Source: MDPI journal article supplement (doi:10.3390/jcm11154573), 2022-08-05
Supplement: s1 [file s1]

**Supplemental Table S1.** Diagnosis Codes For Supracondylar Humerus Fractures.

| ICD 9 CM Description                     | ICD 9 CM | ICD 10 CM Equivalent                                                                                                   |
|------------------------------------------|----------|------------------------------------------------------------------------------------------------------------------------|
| Closed supracondylar fracture of humerus | 812.41   | S42.411A, S42.412A, S42.413A, S42.414A, S42.415A, S42.416A, S42.421A, S42.422A, S42.423A, S42.424A, S42.425A, S42.426A |
| Open supracondylar fracture of humerus   | 812.51   | S42.411B, S42.412B, S42.413B, S42.414B, S42.415B, S42.416B, S42.421B, S42.422B, S42.423B, S42.424B, S42.425B, S42.426B |

**Supplemental Table S2.** Procedure Codes For Supracondylar Humerus Fractures.

|                   | ICD 9 CM            | ICD 10 PCS                                                                                                                                                                                                                                           | CPT                 |
|-------------------|---------------------|------------------------------------------------------------------------------------------------------------------------------------------------------------------------------------------------------------------------------------------------------|---------------------|
| Internal Fixation | 78.52, 79.11, 79.31 | OPHF04Z, OPHF34Z,<br>OPHF44Z, OPHG04Z,<br>OPHG34Z, OPHG44Z,<br>OPHF06Z, OPHF36Z,<br>OPHF46Z, OPHG06Z,<br>OPHG36Z, OPHG46Z,<br>OPSC34Z, OPSC44Z,<br>OPSD34Z, OPSD44Z,<br>OPSF34Z, OPSF44Z,<br>PSG34Z, PSG44Z,<br>OPSC04Z, OPSD04Z,<br>OPSF04Z, PSG04Z | 24538, 24545, 24546 |
